# Supplementary material
Source: Springer Nature journal article supplement (https://www.springermedizin.de/resource/supplementary/12893_2014_515_MOESM3_ESM.pdf/9512620)

## Any complication

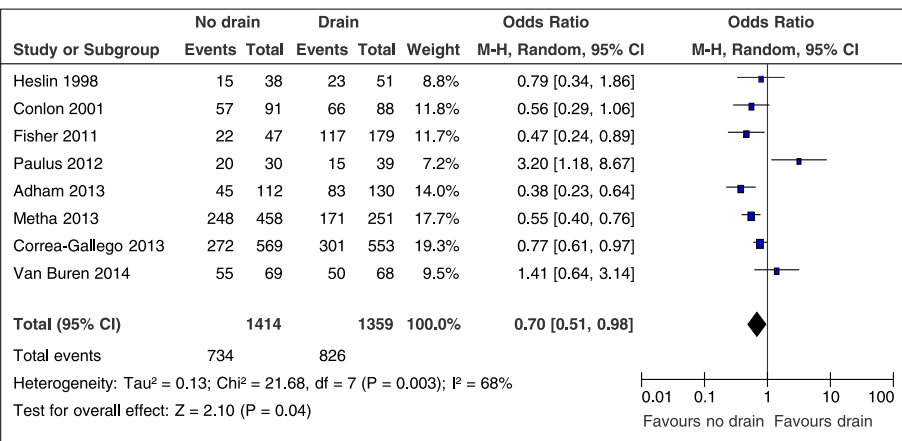

## Minor complication

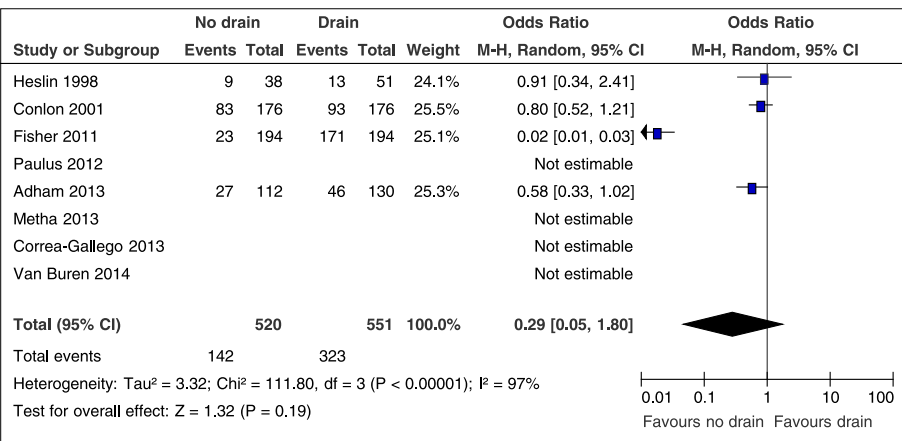

## Major complication

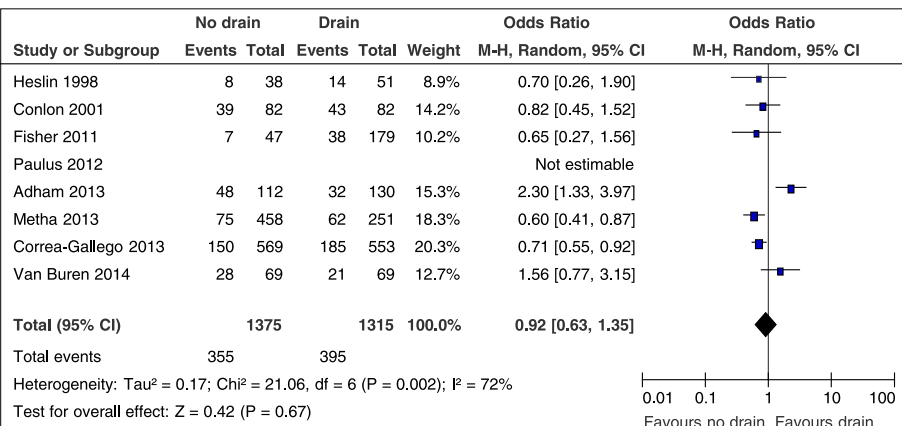

Supplement: MOESM3 [file 9512620]
